1  
2  
3  
4  
5  
6  
7  
8  
9  
10  
11  
12  
13  
14  
15  
16  
17  
18  
19  
20  
21  
22  
23  
24

## **Enumeration of Citrus endophytic bacterial communities based on illumine metagenomics technique**

<sup>1</sup> Sehrish Mushtaq\*, <sup>1a</sup> Muhammad Shafiq, <sup>2</sup> Tehseen Ashraf, <sup>1</sup> Muhammad Saleem Haider, Sagheer Atta\*,<sup>3</sup>

<sup>1</sup> Faculty of Agricultural Sciences, Department of Plant Pathology, University of the Punjab, Quaid-e-Azam Campus, Lahore.

<sup>1a</sup> Faculty of Agricultural Sciences, Department of Horticulture Sciences, University of the Punjab, Quaid-e-Azam Campus, Lahore.

<sup>2</sup> Department of Horticulture Sciences University of Sargodha, Sargodha, Pakistan.

<sup>3</sup> Department of Plant Protection, Faculty of Agricultural Sciences, Ghazi University Dera Ghazhi Khan, Pakistan

\*Corresponding Author e-mail: [sherry.a143@gmail.com](mailto:sherry.a143@gmail.com); [satta@gudgk.edu.pk](mailto:satta@gudgk.edu.pk)

These authors contributed equally to this work.

& These authors also contributed equally to this work.

Running title: Estimation of bacterial diversity from citrus using Illumina Hiseq

25

26

27

28 **Abstract**

29 Citrus is a valuable crop in Pakistan because it is rich in vitamin C and antioxidants. Huanglongbing  
30 (HLB) has an influence on citrus production around the world caused by a bacterium “*Candidatus*  
31 *liberibacter asiaticus*” (CLAs), africanus and americanus. The structure and diversity of bacterial  
32 species in various ecosystems can be quickly examined using NGS. This approach is considerably  
33 quicker and more precise than outdated methods. Healthy or citrus greening infected leaf samples of  
34 Grapefruit, *Citrus aurantifolia*, and *Citrus reticulata* Blanco was used for diversity analysis. In this  
35 study high throughput, NGS technique was used to access the population of both cultivable and non-  
36 cultivable bacterial endophytes from citrus leaves, by using PCR amplicons of 16S rDNA sequences  
37 (V5–V7 regions) with Illumina Hi seq. As a result, a total number of 68,722 sequences were  
38 produced from the test samples. According to the NGS-based diversity classification, the most  
39 common genera of exploited bacterial endophytes were Proteobacteria, Firmicutes, Bacteroides,  
40 Cyanobacteria, and Actinobacteria. *Citrus aurantifolia* and *Citrus paradisi* showed almost equal  
41 diversity, whereas *Citrus reticulata* Blanco had a higher proportion of Proteobacteria and  
42 Cyanobacteria in their leaves. To determine alpha diversity (AD), additional data was analyzed using  
43 statistical indices such as Shannon, Chao1, and Simpson. According to the inverse Simpson diversity  
44 index, the abundance of the microbial population in six different citrus samples was 0.48, 0.567, and  
45 0.163, respectively. The metagenomics of microbiota in plant tissues was successfully recorded by  
46 NGS technology, which can help us learn more about the interactions between plants and microbes.  
47 This research is the first step toward a better understanding of 16SrRNA-based metagenomics from  
48 citrus in Pakistan using Illumina (Hi seq) Technology.

49 Keywords: Citrus,  $\alpha$ -Diversity, bacterial endophytes, Next-generation sequencing, Illumina (Hiseq),  
50 16SrRNA

51

## 52 **Introduction**

53 Pakistan is one of the world's largest citrus producers, ranking 13<sup>th</sup> in total citrus production.  
54 Citrus is highly important due to its economic and nutritional benefits. Kinnow is a useful fruit that  
55 occupies the first place among all fruits in terms of both area and production [1]. The total area under  
56 citrus cultivation during 2014-15 was 192832 hectares with a production of 2395550 (tons) [2].  
57 Punjab is home to nearly all of the world's citrus groves. With more than 75% production of total  
58 citrus fruits, 29.55% of the total area is planted in citrus and 60% in kinnow. About 90% of all citrus  
59 exports are kinnow. Major Citrus species cultivated in Pakistan are as follows; Grapefruit, Sweet  
60 orange, Mandarin, Lemon Lime, Bitter orange [3].

61 Citrus diseases have emerged as a possible threat to global citrus productivity. HLB, a disease  
62 caused by three gram-negative, phloem-limited alphaproteobacteria: “*Candidatus liberibacter*  
63 *asiaticus*” (CLas), africanus, and americanus have a major effect on citrus production worldwide [4].  
64 However, different CLas strains have been recorded from the United States, specifically from Florida  
65 [5-8], Iran [9], Mexico [10], Australia [11], and Pakistan [12]. HLB is distinguished by less nutrient  
66 transfer, resulting in a variety of distinct effects, including yellow shoots, branch dieback, green fruit  
67 remaining, lopsided fruit, reduced size and eventually tree death [13]. The plant microbiome plays a  
68 part in different aspects of plant health and disease, including growth rate, vigor, and tolerance,  
69 inflammation, and disease resistance [14, 15]. Understanding how the microbiome affects and  
70 communicates with the plant would entail the application of several experimental methods, including  
71 a meta-analysis of broad Meta datasets with critical variables relevant to plant health, protection, and  
72 disease [16].

73 NGS is a culture-independent method that is useful for the study of the entire microbial  
74 population within a sample. High-throughput sequencing technologies [17] refer to a group of tools  
75 that can be used to sequence DNA of various base pairs faster and cheaper than previous methods.  
76 NGS sequence of DNA fragment (16S rRNA) in the form of reading (short DNA fragment) as  
77 compared to reference sequences from databases in lesser time to identify the related bacterium with  
78 this fragment [18, 19]. There are various studies of 16SrRNA gene base sequencing for targeted  
79 amplification of bacterial communities [20]. Although, in this era of science researchers are using the  
80 most effective variable (V) region of the 16SrRNA gene for sequencing, with many studies selecting  
81 to examine more than one region as no single region has been shown to optimally differentiate among  
82 bacteria [21, 22]. All nine Variable regions of 16S rRNA displayed bacterial diversity and the most  
83 important step is determining which variable region to sequence, since classification bias variable  
84 region has been found previously [23]. The use of PCR-based molecular techniques (polymerase  
85 chain reaction) has made it possible to research the total diversity of microbes in the natural  
86 environment without the cultivation of microbes [24]. These new advanced techniques are valuable in  
87 increasing our understanding of the microbial communities regardless of some amplification biases  
88 demonstrated due to the selection of suitable primers, the concentration of template, and the number  
89 of amplification cycles [25, 26].

90 NGS-based microbial community research has paved the way for the development of novel  
91 culture-independent bacterial strains capable of identifying biological control agents against the HLB  
92 pathogen (*Candidatus liberibacter asiaticus*). The study of biological control organisms' natural  
93 microbial niches, which are close to those of pathogens, could lead to more successful disease  
94 control. Microbial diversity associated with citrus leaf (phloem) can be identified by either  
95 cultivation-dependent or cultivation-independent methods. On the other hand, the fraction of bacterial

96 diversity measured using previous culture techniques accounts for just 0.1 to 10% of the overall  
97 estimated diversity [27, 28], suggesting that laboratory culture techniques are substantially biased.  
98 However, it is a fact that the majority of dominant bacteria present in environmental samples are  
99 uncultivable [29-32]. 16S rDNA-based phylogenetic analysis has been widely used to classify  
100 microbial diversity in different environmental niches, such as soil [30], plants [33, 34], subsurface  
101 sediments, and rocks [35]. The primary aim of this research was to determine whether bacteria other  
102 than *Ca. Liberibacter spp.* is associated with the citrus greening disease.

103         Microbial diversity research is important for recognizing the microbial flora that exists on  
104 plants in their natural environment. The diversity of bacterial endophytes from citrus in Pakistan is  
105 the focus of this report, which is based on preliminary research. The uncultivable and cultivable  
106 fraction of bacteria is first time exploited from citrus leaves through the Illumina metagenomics  
107 technique (Hi seq) in Pakistan. There has been an increased recognition that it is necessary to pay  
108 more attention to this area. NGS (next-generation sequencing) is an incredibly valuable technique to  
109 access the uncultivable fraction of bacterial endophytes in plant tissues. This could help us better  
110 understand the microbes that live on plant surfaces in natural conditions and how they interact. To the  
111 best of our understanding, this is Pakistan's initial 16SrRNA-based metagenomics study from citrus  
112 leaves using Illumina (Hi seq). The main objectives of this research were to investigate the microbial  
113 species associated with the leaf midribs of HLB symptomatic and asymptomatic citrus (*Citrus*  
114 *aurantifolia*, *Citrus paradisi*, *Citrus reticulata* Blanco) trees and also to know their relative  
115 abundance, and phylogenetic diversity by using high-throughput 16S rDNA (V5-V7) next-generation  
116 sequencing through Illumina (Hi-seq).

## 117 **Materials and Methods**

### 118 **Samples collection and DNA isolation:**

119 Leaf samples (healthy/infected) of grapefruit, *Citrus aurantifolia*, and *Citrus reticulata* Blanco were  
120 obtained from IAGS, Pu, Lahore backfields and preserved at -80°C. Citrus plants that were six years  
121 old were used for this experiment and five leaves per plant were taken as a sample and stored at -  
122 80°C. To extract soil particles, every plant leaf was washed and cleaned under running tap water. The  
123 leaves were washed in autoclaved water with a few drops of Tween-20 and set aside to drain for 10–  
124 15 minutes. Then they were cut into 4–5 bits, each measuring 2–3cm in length. Surface sterilization  
125 was carried out using the methods defined by [36], with some variations in the Ethanol conc. and  
126 sterilization time. Soft tissue were submerged in ninety percent ethanol soln. for 5 minutes, then in a  
127 3 percent sodium hypochlorite solution for 2 minutes, and finally in 75% ethanol (3 min). The  
128 disinfected leaves were drained in a laminar flow hood after being rinsed three times with autoclaved  
129 distilled water. The surface-sterilized tissues (control) and the last rinsing water were inoculated onto  
130 nutrient agar plates to confirm the efficacy of the surface sterilization procedure. Any bacteria growth  
131 in the control agar plates within 24 hours of incubation (30°C±2°C) indicates ineffective surface  
132 sterilization. The complete genome of DNA was extracted using the CTAB method (cetyl trimethyl  
133 ammonium bromide), as defined by [37]. At A260/280 nm (1.9–2.0), the isolated DNA was  
134 quantified and tested for purity (Nanodrop at School of Biological Sciences Pu, Lahore) and stored at  
135 -20°C before being processed. For NGS (Illumina Hi seq), these quantified DNA samples were sent  
136 to the Novo gene (leading-edge genomics services and solutions).

### 137 **Generation of Amplicon:**

138 The bacterial genomic DNA concentration in leaf tissue samples was normalized to 10 ng/L. The  
139 conserved regions of 16S rRNA were amplified using PCR (V5-V7-WBI-NV2018010942). Phusion®  
140 High-Fidelity PCR Master Mix was used to prepare the PCR library (New England Biolabs). Briefly,  
141 25 µL PCR reaction comprises DNA (6 µL), 12.5 µL of (2x) Master KAPA Hi-Fidelity DNA  
142 polymerase (1 U), primer (10 µM) 1.5 µL (each), and distilled autoclaved water. PCR reactions were

143 initiated with 95°C for 3 min (denaturation cycle) followed by 24 cycles at 98°C for 20 sec, 55°C for  
144 15 sec, and 72°C for 10 sec, and ended at 72°C for 1 min (Extension step). Mix the same amount of  
145 1X loading buffer (with SYB green) with PCR products and run electrophoresis on 2% agarose gel  
146 for detection. Samples with a bright main strip between 400-450bp were selected for further studies.  
147 PCR products were Gel purified by using Qiagen Kit Manufactured by (Qiagen, Germany).

#### 148 **Library preparation and sequencing:**

149 Sequence libraries were generated using the TruSeq® DNA PCR-Free Sample Preparation Kit  
150 (Illumina, USA) following the instructions given. The quality of the library was analyzed by the  
151 Qubit@ 2.0 Fluorometer (Thermo Scientific) and the Agilent Bioanalyzer 2100 system. To conclude,  
152 the library was sequenced on the Illumina HiSeq 2500 platform and 250 bp paired-end reads were  
153 produced. A preliminary study of the illustration and base call was performed on the HiSeq  
154 instrument. Hi Seq (ultra-high-throughput) was used to de-multiplex data and exclude reads in  
155 FASTQ format that failed the Illumina purity filter (PF = 0). The forward and reverse reads of raw  
156 data were combined using the mother pipeline alignment method. Following that, they were trimmed  
157 and filtered by deleting the bases with rating scores less than or equal to 2, the maximum number of  
158 N accepted = 4, the maximum number of homopolymers accepted = 8, and the contaminant removed.  
159 All tests were performed using the Mothur pipeline program software (<http://www.mothur.org/wiki/>).

#### 160 **Classification of bacteria**

161 The SILVA rRNA database and the Silva database were used to assign operational taxonomic units  
162 (OTUs) were assigned to the retrieved read sequences produced from the leaf samples. We used the  
163 mother pipeline's "splitting by classification" process to assign OTU.

#### 164 **Statistical analysis**

165 All of the data was processed using one-way ANOVA. The Statistical Package for Social Science  
166 (SPSS) was used to conduct the analysis, Tukey's Studentized Range Test HSD (0.05) has been used  
167 to compare the means, and p values less than 0.05 which were considered statistically significant.

## 168 **Diversity Analysis**

169 Alpha and beta are two methods of diversity analysis that are commonly used to find diversity using  
170 NGS. Alpha diversity (AD) is used to analyze the complexity of species diversity in the experiment  
171 by diversity indices, including Observed-Species, Chao1, Shannon, Simpson, ACE, and Good-  
172 coverage. All of these indices were measured with QIIME and viewed with the R program. Beta  
173 Diversity (BD) Analysis was used to assess differences in sample species complexity. Beta Diversity  
174 was measured using QIIME software Unit fraction metrics (unifrac), as weighted and unweighted.  
175 Unifrac is a method of calculating the phylogenetic distance between taxonomic groups in a tree as a  
176 percentage of the length of the branch that contributes to ancestors from either one or both origins.  
177 Arithmetic Means in an Unweighted Pair-group Method (UPGMA) QIIME was used to perform  
178 clustering, a hierarchical clustering technique that uses average linkage to interpret the distance  
179 matrix.

## 180 **RESULTS**

### 181 **DNA extraction for Next-Generation Sequencing (Hi seq)**

182 Leaf samples of both healthy and symptomatic *Citrus paradisi*, *C. reticulata* Blanco, and *C.*  
183 *aurantifolia* were obtained from the backyard of the Institute of Agricultural Sciences and preserved  
184 at -80°C. The CTAB method was used to separate DNA from the leaf samples. To access the diversity  
185 of cultivable vs. non-cultivable bacteria, isolated DNA was electrophoresed in a 1% agarose gel (to  
186 verify DNA) and, quantified through nanodrop before further processing. sent for Illumina Hi seq  
187 NGS technique.

### 188 **Sequencing and data processing**



189 The Illumina paired-end network was used to sequence the PCR amplicon yielding raw reads (Raw  
 190 PE) with paired ends of 250 bp that were then extracted and Clean Tags were obtained after being  
 191 pretreated. To obtain Effective Tags, Clean Tags that included chimeric sequences were identified  
 192 and excluded. The data output indicates data interpretation and QC status ([Table 1](#)).

193 **Table 1: Data processing and QC (quality control) stats of citrus (*Citrus aurantifolia* , *Citrus*  
 194 *paradisi* , *Citrus reticulata* Blanco) samples.**

| Sample abbreviations used in this study   | Raw PE (#) | Raw Tags (#) | Clean Tags (#) | Effective Tags (#) | Base (nt)  | AvgLen (nt) | Q20   | Q30   | GC %  | Effective % |
|-------------------------------------------|------------|--------------|----------------|--------------------|------------|-------------|-------|-------|-------|-------------|
| <i>C.aurantifolia</i> Healthy (SM1)       | 42,914     | 41,860       | 39,641         | 26,813             | 9,982,254  | 372         | 98.60 | 97.08 | 53.71 | 62.48       |
| <i>C.aurantifolia</i> Infected (SM2)      | 35,655     | 34,844       | 33,190         | 22,880             | 8,21,549   | 372         | 98.66 | 97.22 | 53.77 | 64.17       |
| <i>C.paradisi</i> Healthy (MK1)           | 68,722     | 67,168       | 63,631         | 55,999             | 20,820,815 | 372         | 98.58 | 97.05 | 53.36 | 81.49       |
| <i>C.paradisi</i> Infected (MK2)          | 57,447     | 56,216       | 53,447         | 47,782             | 17,789,958 | 372         | 98.58 | 97.07 | 53.57 | 83.18       |
| <i>C.reticulata</i> Blanco Healthy (MA1)  | 33,837     | 33,037       | 31,226         | 24,496             | 9,149,614  | 374         | 98.53 | 96.98 | 55.43 | 72.39       |
| <i>C.reticulata</i> Blanco Infected (MA2) | 30,903     | 30,223       | 28,359         | 25,189             | 9,440,842  | 375         | 98.45 | 96.82 | 55.99 | 81.51       |

195

## 196 OTU Clustering and species annotation

197 All Successful Tags were grouped into OTUs based on 97% DNA sequence similarity to evaluate the  
 198 species diversity in each sample. Detailed information gathered from a variety of samples, such as  
 199 Tag annotation data, effective Tags data, and low-frequency Tags data was collected during the  
 200 construction of OTUs. The statistical data set is organized as follows ([Fig. 1](#)).

201 Figure 1: Statistical analysis of the tags and operational taxonomic units of each tested citrus leaf  
 202 sample

## 203 Phylogenetic Tree

204 R and D software was used to select independently the most common top ten genera of  
 205 specific species with high relative abundance by default) for the construction of a phylogenetic tree  
 206 [[51](#)]. Actinobacteria, Cyanobacteria, and Firmicutes, as well as Proteobacteria, were identified that  
 207 belong to the phylum (Alpha, beta, and gamma). The research samples were found to be infected with

208 eight orders and nine groups of bacteria (figure tree of particular species in samples SM-1/SM-2  
209 (Asymptomatic/Symptomatic *Citrus aurantifolia*); Mk-1/MK-2 (Asymptomatic/ Symptomatic *Citrus*  
210 *paradisi*); MA1/MA2 (Asymptomatic/Symptomatic *Citrus reticulata* Blanco). In this diagram, the  
211 four major phyla are represented (Fig. 2).

212 Figure 2: Taxonomy tree of specific species in citrus leaf samples.

### 213 **Relative Abundance of Species**

214 To structure the scattering of relative abundance of species in histograms, the top 10 species in each  
215 taxonomic rank were chosen. The distribution of the phyla can be seen in (Fig. 3) and the relative  
216 abundance of bacterial species in normal vs. infected leaves revealed that SM1/SM2 (*Citrus*  
217 *aurantifolia* asymptomatic/symptomatic) has a higher proportion of Proteobacteria, whereas the  
218 infected one has a smaller proportion of other phyla, with Cyanobacteria dominating among them.  
219 MKI/MK2 (*Citrus paradisi* asymptomatic /symptomatic) showed a similar pattern. MA1/MA2 (*Citrus*  
220 *reticulata* Blanco asymptomatic/ symptomatic) had 40% Proteobacteria and 60% Cyanobacteria,  
221 while MA2 had 20% Proteobacteria and the remaining 80% Cyanobacteria and another phylum. The  
222 relative abundance of bacteria is calculated by integrating both symptomatic and asymptomatic  
223 bacteria into one group were represented through; Bac-1 (*Citrus aurantifolia*) community revealed  
224 90% Proteobacteria and just around 10% cyanobacteria. While in Bac-2 (*Citrus paradisi*) group only  
225 Proteobacteria was found in abundance. Bac-3 (*Citrus reticulata* Blanco) community, on the other  
226 hand, had a 25% proportion of Proteobacteria and a 75% proportion of Cyanobacteria and others.

227 Figure 3: Relative abundance of bacterial Species at phylum level from citrus leaves

### 228 **The Phylogenetic tree**

229 The top hundred taxa have been selected, and the evolutionary tree was built by aligning the  
230 sequences. Each genus' relative abundance was measured as shown in (Fig. 4).

231 Figure 4: The evolutionary tree based on the genus of Bacterial endophytes from citrus leave

232 Venn diagrams were also constructed based on operational taxonomic units of the identified bacteria  
 233 from citrus leaf samples as shown in (Fig.5).

234 Figure 5: Venn diagram constructed based on operational taxonomic units of the bacterial diversity  
 235 from citrus leaf samples

### 236 **Alpha and Beta diversity Analysis**

237 OTUs with 97% sequence identity are assumed to be homologous among species and statistical  
 238 indices of AD are listed in (Table 2).

239 **Table 2: Statistical analysis of alpha diversity (AD) indices from NGS data of citrus leaves**

| <i>Sample Abbreviations used in this study</i> | <b>No of species observed</b> | <b>Simpson</b> | <b>Shannon</b> | <b>Chao1</b> | <b>ACE</b> | <b>Good coverage</b> | <b>PD whole tree</b> |
|------------------------------------------------|-------------------------------|----------------|----------------|--------------|------------|----------------------|----------------------|
| <i>C.aurantifolia</i> Healthy (SM1)            | 128                           | 0.484          | 2.120          | 141.571      | 138.761    | 0.999                | 9.691                |
| <i>C.aurantifolia</i> Infected (SM2)           | 131                           | 0.567          | 2.290          | 138.241      | 144.296    | 0.999                | 9.428                |
| <i>C.paradisi</i> Healthy (MK1)                | 92                            | 0.163          | 0.751          | 113.136      | 130.639    | 0.998                | 8.407                |
| <i>C.paradisi</i> Infected (MK2)               | 87                            | 0.307          | 1.245          | 102.812      | 105.703    | 0.999                | 8.125                |
| <i>C.reticulata</i> Blanco Healthy (MA1)       | 104                           | 0.741          | 2.419          | 120.714      | 130.361    | 0.999                | 8.699                |
| <i>C.reticulata</i> Blanco Infected (MA2)      | 69                            | 0.539          | 1.602          | 84.833       | 88.361     | 0.999                | 6.379                |

240

### 241 **Beta Diversity Indices and heat map**

242 Unweighted vs. Weighted Unifrac distances, which are phylogenetic indicators that are commonly  
 243 used in current bacterial community sequencing projects, were chosen to quantify the dissimilarity  
 244 coefficient between pairwise samples. In this graph, a heat map centered on the weighted  
 245 vs. unweighted Unifrac distances is plotted (Fig.6). The red section of the triangle suggests that there  
 246 is less beta variety among samples, whereas the yellow portion indicates that there is more beta  
 247 diversity among samples (SM2, MK1, MK2, and MA1).

248 **Figure 6: Illustrates beta diversity analysis (Heat map) based on Weighted/Unweighted**  
 249 **Unifrac distances.**

250 **Unweighted Pair-group Method with Arithmetic Mean (UPGMA)**

251 Clustering analysis and the construction of a clustering tree were used to investigate the  
252 similarities between different samples. The (UPGMA) procedure with arithmetic mean is a type of  
253 hierarchical clustering method used for classifying ecosystem samples. The following are  
254 fundamental concepts of UPGMA methods. The samples with the shortest distance were being  
255 grouped, and then a new sample is generated. It has a branching point in the middle of the two initial  
256 samples. After computing the average distance between the newly created "sample" and other  
257 samples, the closest two samples can be used to repeat the procedures adopted earlier in this section.  
258 Until all of the samples are clustered together, a complete clustering tree can be obtained. Before  
259 conducting UPGMA cluster analysis, the Weighted Unifrac distance matrix and the Unweighted  
260 Unifrac distance matrix were calculated. They could be seen in a graph that included the clustering  
261 results as well as every sample's phylum-specific relative abundance (Fig. 7a and 7b).

262 The SM1/SM2 and MK1/MK2 clusters in the same clade had more or less similar bacterial diversity,  
263 according to the UPGMA cluster tree based on the Weighted Unifrac distance tree, however,  
264 MA1/MA2 displayed a distinct configuration and is in a different clade, indicating that *Citrus*  
265 *reticulata* Blanco has a different bacterial diversity than *Citrus aurantifolia* and *Citrus paradisi*. The  
266 UPGMA cluster tree based on unweighted unifrac distance displays a variable pattern if compared to  
267 the weighed unifrac distance tree. MK1/MK2 is in a distinct clade in unweighted unifrac distance  
268 trees, whereas the other two groups are all in the same clade, as seen in (Fig.7b). MK1/MK2 had a  
269 higher proportion of Bacteroides than the others. As a whole, the most common genera found in three  
270 samples were Proteobacteria, Cyanobacteria, and Actinobacteria.

271 Figure 7: UPGMA cluster tree based on a) Weighted Unifrac distance b) Un Weighted Unifrac  
272 distance showing the relative abundance of bacterial species at phyla level.

273 **DISCUSSION**

274 A microbial community study is a fast way to learn regarding the structure and functioning of  
275 bacterial communities, and it could contribute to the isolation and detection of new bacteria [38]. This  
276 research explores the diversity and composition of microbial communities in the leaf midribs of both  
277 HLB-affected and healthy citrus plants. Our research discovered that the Illumina sequencing  
278 protocol can be used to evaluate the bacterial endophytes present in plant tissues. The sequencing can  
279 be improved with a good choice of primer pair to amplify a longer stretch of the 16S rRNA gene. Our  
280 empiric findings illustrate the importance of this platform for accurate and high-resolution microbiota  
281 profiling (N90% at species level) of endophytic populations or may be extended to other  
282 resources/samples. It was critical to design multiple testing procedures to minimize the bias  
283 introduced by host DNA (chloroplast) and chimaera, which were both removed without changing the  
284 overall read quality. We have a good likelihood of executing the read sequence efficiently on a  
285 specific platform with the Mothur pipeline. This reduced the possibility of read contamination.

286 The total diversity and complexity of microbiome populations in plant tissues, which include both  
287 cultivable and non-cultivable endophytic bacteria, were also exposed using the novel NGS shotgun  
288 16S rRNA gene. Alpha diversity (AD), comprised of species abundance boxplots, species richness  
289 curves, and statistical analysis indices, is a common technique for evaluating bacterial  
290 diversity within populations [39]. The spreading of bacterial species across tissues and the overall  
291 mutual richness is illustrated in this Venn diagram. The Venn diagram (map) of the OTU distribution  
292 exposed a colonization pattern of Acinetobacteria 1.41%, Cyanobacteria 28.56%, Firmicutes 1.31%,  
293 and Proteobacteria 63.76% of microbes contained in plant leaves were also identified in three  
294 samples.

295 The phylum cyanobacteria were found to be more common in *C. reticulata* Blanco as compared to  
296 other phyla. On the contrary, the other two samples presented a greater fraction of Proteobacteria, and  
297 few phyla were not observed by culture-based methods, illustrating the importance of NGS. This also

298 led to the fact that these microbes can spread through a variety of channels that penetrate plant tissues  
299 [40, 41]. Finally, Proteobacteria, Firmicutes, Actinobacteria, Cyanobacteria, and Bacteroidetes were  
300 found to colonize citrus plant leaf tissues, they have been demonstrated to produce useful bioactive  
301 chemicals. A comparison of bacterial species based on their structure is referred to as beta diversity.  
302 As a result, the differences in microbial populations are measured using beta-diversity metrics. A  
303 square "distance" or dissimilarity matrix, such as Unweighted Unifrac, was calculated to reflect the  
304 contrast among test plant leaves to compare microbial communities between each pair of group  
305 samples [42, 43] and Weighted Unifrac distances [44].

306 At the phylum level, Actinobacteria accounted for 26.47 percent, Cyanobacteria for 2.94 percent,  
307 Firmicutes for (23.52%), and Proteobacteria for (47.05%), which was significantly higher than the  
308 fraction of other phyla. Though we found 100 genera among them most common were  
309 Staphylococcus, Pseudomonas, Lactobacillus, Sphingomonas, Bacillus, Streptomyces, and Pantoea.  
310 Bacillus and Lactobacillus, as well as Streptomyces, have previously been found in the roots or  
311 leaves of infected (CLAs) or infected citrus trees [46-49]. Pantoea, Curtobacterium, and  
312 Methylobacterium were also detected in citrus leaves in this analysis. All of these have previously  
313 been characterized in terms of bud wood, leaves, and roots [50].

314 Through studying the PCR products of 16S rDNA sequences covering two specific regions (V3-V4  
315 regions), [45] discovered the diversity of bacterial endophytes from Aloe vera plant leaves, stems,  
316 and roots using the NGS by illumina Hi seq technology. The most popular genera identified were  
317 Proteobacteria, Firmicutes, Actinobacteria, and Bacteroidetes. This research was identical to the  
318 findings of the current study, but we looked for diversity in the V5-V7 region of 16S r RNA. Illumina  
319 for next-generation sequencing Hiseq is a relatively new method, with only a limited amount of  
320 literature available on it. The discovery of novel bacterial endophytes from citrus illustrates the

321 significance of this study. There has been no comparable work being done with this technique in  
322 citrus in other regions of the world, not yet in Pakistan.

### 323 **Conclusion**

324 The predominant bacterial groups in the leaf of citrus varieties were Proteobacteria, Actinobacteria,  
325 Cyanobacteria, Firmicutes, and Bacteroides, although other groups were commonly found to be less  
326 prevalent. Through the culture-dependent method, we find changes in bacterial diversity of  
327 endophytes from a citrus leaf but in comparison with an uncultured method, no significant variations  
328 existed in relative abundance and diversity of bacteria among taxa from both symptomatic and  
329 asymptomatic leaf samples. Some genera such as Staphylococcus, Enterococcus, Enterobacter,  
330 Pseudomonas, Bacillus, and Burkholderia were also found in the cultured approach (unpublished  
331 data). Although the type of strains has a significant influence on their functional characterization in  
332 terms of plant growth-promoting traits rather than their source of isolation either from bulk soil or  
333 rhizosphere soil. These genera have been widely found in most of the diversity-related studies of  
334 different parts of plants and soils. Some of the isolated strains have great potential to enhance plants  
335 growth and they can also be utilized as biocontrol agents against different plant diseases. Finally, this  
336 study indicates that these endophytic bacteria may be tested in open field conditions on the same host  
337 plants to see whether their biocontrol potential or plant growth-promoting action is successful.  
338 Furthermore, their effects on plant physiology could be estimated. We may use these endophytes to  
339 produce biofertilizers to replace chemical fertilizers if the same results are obtained from field trials.

### 340 **Acknowledgments**

341 The first author acknowledges the financial grant from Higher Education Commission (HEC) Pakistan.

### 342 **References**

- 343 1. Usman M, Ashraf I, Chaudhary KM, Talib. Factors impeding citrus supply chain in Central  
344 Punjab, Pakistan. *Int J Agri Ext.*2018; 6:1-5.

- 345 2. Government of Pakistan. Ministry of National Food Security & Research Islamabad;2016.
- 346 3. Naz S, Shahzadi K, Rashid S, Saleem F, Zafarullah A, Ahmad S.et al. Molecular  
347 characterization and phylogenetic relationship of different citrus varieties of Pakistan. J Anim  
348 Plant Sci.2014; 24: 315-320.
- 349 4. Wang N, Pierson EA, Setubal JC, Xu J, Levy JG, Zhang Y, Li J, Rangel LT, Martins JJ. et al.  
350 The Candidatus Liberibacter–host interface: insights into pathogenesis mechanisms and disease  
351 control. Annu Rev Phytopathol.201; 55: 451-482.
- 352 5. Chen J, Deng X, Sun X, Jones D, Irey M, Civerolo E. et al. Guangdong and Florida populations  
353 of ‘Candidatus Liberibacter asiaticus’ distinguished by a genomic locus with short tandem  
354 repeats. Phytopathology.2010;100: 567-572.
- 355 6. Zheng Z, Wu F, Kumagai L , Polek M, Deng X, Chen J.et al. Two ‘Candidatus Liberibacter  
356 asiaticus’ strains recently found in California harbor different prophages. Phytopathology.2017;  
357 107: 662-668.
- 358 7. Kunta M, Zheng Z, Wu F, da Graca JV, Park JW, Deng X, Chen J.et al. Draft whole-genome  
359 sequence of “Candidatus Liberibacter asiaticus” strain TX2351 isolated from Asian citrus  
360 psyllids in Texas, USA. Genome announc.2017; 5(15).
- 361 8. Hall D. Incidence of “Candidatus Liberibacter asiaticus” in a Florida population of Asian citrus  
362 psyllid. J Appl Entomol.2018; 142: 97-103.
- 363 9. Passera A, Alizadeh H, Azadvar M, Quaglino F, Alizadeh A, Casati P, Bianco P. et al. Studies of  
364 Microbiota Dynamics Reveals Association of “Candidatus Liberibacter Asiaticus” Infection with  
365 Citrus (*Citrus sinensis*) Decline in South of Iran. Int J Mol Sci.2018; 19: 1817.
- 366 10. Lopez-Buenfil JA, Ramirez-Pool JA, Ruiz-Medrano R, Montes-Horcasitas M del Carmen,  
367 Chavarin-Palacio C, Moya-Hinojosa J, Trujillo-Arriaga FJ, Carmona RL, Xoconostle-Cazares B.



- 368 et al. Dynamics of Huanglongbing-associated Bacterium Candidatus *Liberibacter asiaticus* in  
369 *Citrus aurantifolia* Swingle (Mexican Lime). *Pak J Biol Sci.*2017; 20:113-123.
- 370 11. Luo X , Yen AL, Powell KS, Wu F, Wang Y, Zeng L, Yang Y, Cen Y.et al. Feeding behavior of  
371 *Diaphorina citri* (Hemiptera: Liviidae) and its acquisition of 'Candidatus *Liberibacter asiaticus*',  
372 on huanglongbing-infected *Citrus reticulata* leaves of several maturity stages. *Fla*  
373 *Entomol.*2015;186-192.
- 374 12. Yaqub MS, Khan IA, Usman M, Rana IA. Molecular detection of Candidatus *Liberibacter*  
375 *asiaticus*, the causal organism of huanglongbing (Citrus greening) in Faisalabad, Pakistan for  
376 huanglongbing management. *Pak J Agri Sci.*2017; 54.
- 377 13. da Graça JV, Douhan GW, Halbert SE, Keremane ML, Lee RF, Vidalakis G, Zhao H.et al.  
378 Huanglongbing: An overview of a complex pathosystem ravaging the world's citrus. *J Integr*  
379 *Plant Biol.*2016; 58: 373-387.
- 380 14. Schlaeppi K, Bulgarelli D. The plant microbiome at work. *Mol Plant-Microbe Interact.*2015;  
381 28:212-217.
- 382 15. Vogel C, Bodenhausen N, Grisse W, Vorholt JA. The Arabidopsis leaf transcriptome reveals  
383 distinct but also overlapping responses to colonization by phyllosphere commensals and  
384 pathogen infection with impact on plant health. *New Phytol.*2016; 212: 192-207.
- 385 16. Ginnan NA, Dang T, Bodaghi S, Ruegger PM, Peacock BB, McCollum G, England G, Vidalakis  
386 G, Roper C, Rolshausen P, Borneman J.et al. Bacterial and Fungal Next Generation Sequencing  
387 Datasets and Metadata from Citrus Infected with 'Candidatus *Liberibacter asiaticus*'.  
388 *Phytobiomes.*2018; 2(2): 64-70.
- 389 17. Rodríguez-Ezpeleta N, Hackenberg M, Aransay AM. "Bioinformatics for high throughput  
390 sequencing," Springer Science & Business Media;2011.

- 391 18. Bybee SM, Bracken-Grissom H, Haynes BD, Hermansen RA, Byers RL, Clement MJ, Udall JA,  
392 Wilcox ER, Crandall KA. et al. Targeted amplicon sequencing (TAS): a scalable next-gen  
393 approach to multilocus, multitaxa phylogenetics. *Genome Biol Evol.*2011;3:1312-1323.
- 394 19. Karagöz MA, Nalbantoglu OU. Taxonomic classification of metagenomic sequences from  
395 Relative Abundance Index profiles using deep learning. *Biomed Signal Process.*2021; 67,  
396 102539.
- 397 20. Chakravorty S, Helb D, Burday M, Connell N, Alland D. A detailed analysis of 16S ribosomal  
398 RNA gene segments for the diagnosis of pathogenic bacteria. *J Microbiol Methods.*2007;69:330-  
399 339.
- 400 21. Mizrahi-Man O, Davenport ER, Gilad Y. Taxonomic classification of bacterial 16S rRNA genes  
401 using short sequencing reads: evaluation of effective study designs. *PloS one.*2013; 8: e53608.
- 402 22. Alindonosi A, Baeshen M, Elsharawy N. Prospects For Diatoms Identification Using  
403 Metagenomics: A Review. *Appl Ecol Environ Res.*2021;19(6):4281-4298.
- 404 23. Vilo C, Dong Q. Evaluation of the RDP classifier accuracy using 16S rRNA gene variable  
405 regions. *Metagenomics.*2012;1: 1-5.
- 406 24. Hugerth LW, Andersson AF. Analysing microbial community composition through amplicon  
407 sequencing: from sampling to hypothesis testing. *Front Microbiol.*2017;8:1561.
- 408 25. Shokralla S, Spall JL, Gibson JF, Hajibabaei M. Next-generation sequencing technologies for  
409 environmental DNA research. *Mol Ecol.*2012; 21:1794-1805.
- 410 26. Takahashi S, Tomita J, Nishioka K, Hisada T, Nishijima M. Development of a prokaryotic  
411 universal primer for simultaneous analysis of bacteria and archaea using next-generation  
412 sequencing. *PloS one.*2014; 9:e105592.

- 413 27. Thao ML, Baumann P. Evolutionary relationships of primary prokaryotic endosymbionts of  
414 whiteflies and their hosts. *Appl Environ Microbiol* .2004;70:3401-3406.
- 415 28. Lennon JT, Muscarella ME, Placella SA, Lehmkuhl BK. How, when, and where relic DNA  
416 affects microbial diversity. *MBio*.2018; 9(3): e00637-18.
- 417 29. de Melo Pereira GV, Magalhaes KT, Lorenzetti ER, Souza TP, Schwan RF. A multiphasic  
418 approach for the identification of endophytic bacterial in strawberry fruit and their potential for  
419 plant growth promotion. *Microb Ecol*.2012; 63: 405-417.
- 420 30. Kim YC, Leveau J, Gardener BBM, Pierson EA, Pierson LS, Ryu Cm.et al. The multifactorial  
421 basis for plant health promotion by plant-associated bacteria. *Appl Environ Microbiol*.2011; 77:  
422 1548-1555.
- 423 31. Polz MF, Cavanaugh CM. Bias in template-to-product ratios in multitemplate PCR. *Appl*  
424 *Environ Microbiol*.1998;64: 3724-3730.
- 425 32. Schneider H. Anatomy of greening-diseased sweet orange shoots. *Phytopathology*.1968; 58:  
426 1555-1160.
- 427 33. Chelius M, Triplett E. The Diversity of Archaea and Bacteria in Association with the Roots of  
428 *Zea mays* L. *Microb Ecol*.2001;41: 252-263.
- 429 34. Singh BK, Millard P, Whiteley AS, Murrell JC. Unravelling rhizosphere–microbial interactions:  
430 opportunities and limitations. *Trends Microbiol*.2004;12:386-393.
- 431 35. Chandler D, Fredrickson J, Brockman F. Effect of PCR template concentration on the  
432 composition and distribution of total community 16S rDNA clone libraries. *Mol Ecol*.1997;  
433 6:475-482.
- 434 36. Azevedo JL, Maccheroni JW, Pereira JO, de Araújo WL. Endophytic microorganisms: a review  
435 on insect control and recent advances on tropical plants. *Electron J Biotechnol*.2000;3: 15-16.
- 436 37. Wilson K. Preparation of genomic DNA from bacteria. *Curr. Protoc. Mol. Biol*.1987;2-4.

- 437 38. Costa LE, Queiroz MVD, Borges AC, Moraes CAD, Araujo EFD . Isolation and characterization  
438 of endophytic bacteria isolated from the leaves of the common bean (*Phaseolus vulgaris*). *Braz J*  
439 *Microbiol.*2012;43:1562-1575.
- 440 39. Caporaso JG, Lauber CL, Walters WA, Berg-Lyons D, Huntley J, Fierer N, Gormley N.et al.  
441 Ultra-high-throughput microbial community analysis on the Illumina HiSeq and MiSeq  
442 platforms. *ISME J.*2012;6(8):1621-1624.
- 443 40. Huang JS. Ultrastructure of bacterial penetration in plants. *Annu Rev Phytopathol.*1986; 24:141-  
444 157.
- 445 41. Quadt-Hallmann A, Kloepper J, Benhamou N. Bacterial endophytes in cotton: mechanisms of  
446 entering the plant. *Can J Microbiol.*1997; 43:577-582.
- 447 42. Lozupone C, Knight R. UniFrac: a new phylogenetic method for comparing microbial  
448 communities. *Appl Environ Microbiol.*2005; 71: 8228-8235.
- 449 43. Lozupone C, Lladser ME, Knights D, Stombaugh J, Knight R. UniFrac: an effective distance  
450 metric for microbial community comparison. *ISME J.*2011; 5:169.
- 451 44. Lozupone CA, Hamady M, Kelley ST, Knight R. Quantitative and qualitative  $\beta$  diversity  
452 measures lead to different insights into factors that structure microbial communities. *Appl*  
453 *Environ Microbiol.*2007; 73: 1576-1585.
- 454 45. Akinsanya MA, Goh JK, Lim SP, Ting ASY. Metagenomics study of endophytic bacteria in  
455 *Aloe vera* using next-generation technology. *Genomics data.*2015;6:159-163.
- 456 46. Trivedi P, Duan Y, Wang N. Huanglongbing, a systemic disease, restructures the bacterial  
457 community associated with citrus roots. *Appl Environ Microbiol.*2010;76(11):3427-3436.
- 458 47. Trivedi P, He Z, Van Nostrand JD, Albrigo G, Zhou J, Wang N.et al. Huanglongbing alters the  
459 structure and functional diversity of microbial communities associated with citrus rhizosphere.  
460 *ISME.*2012; J 6:363.

- 461 48. Trivedi P, Spann T, Wang N. Isolation and characterization of beneficial bacteria associated with  
462 citrus roots in Florida. *Microb Ecol.*2011; 62: 324-336.
- 463 49. Zhang M, Powell CA, Benyon LS, Zhou H, Duan Y. Deciphering the bacterial microbiome of  
464 citrus plants in response to ‘Candidatus Liberibacter asiaticus’-infection and antibiotic  
465 treatments. *PloS one.*2013;8:e76331.
- 466 50. Blaustein RA, Lorca GL, Meyer JL, Gonzalez CF, Teplitski M. Defining the core citrus leaf-and  
467 root-associated microbiota: Factors associated with community structure and implications for  
468 managing huanglongbing (citrus greening) disease. *Appl. Environ. Microbiol.*2017; 83(11):  
469 e00210-17.
- 470 51. DeSantis TZ, Hugenholtz P, Larsen N, Rojas M, Brodie E, Keller K, Andersen GL. et al.  
471 Greengenes, a chimera-checked 16S rRNA gene database and workbench compatible with  
472 ARB. *Appl. Environ. Microbiol.*2006;72(7):5069-5072.
- 473





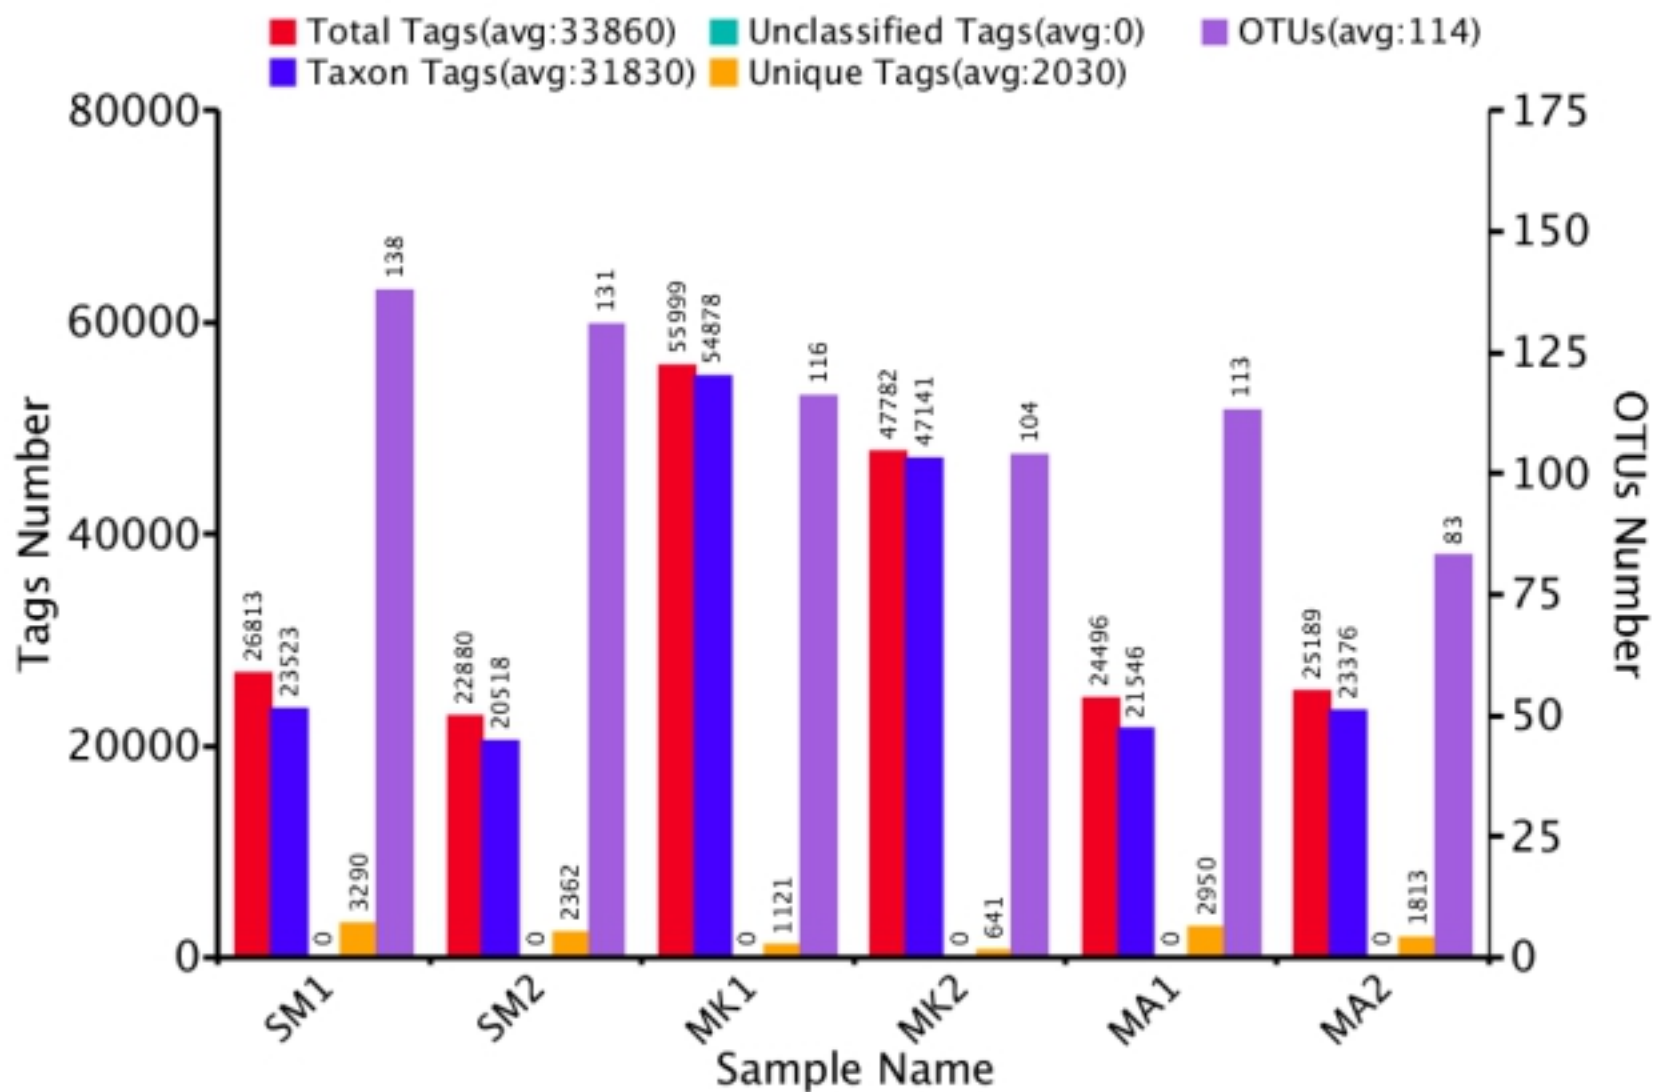

Fig. 1



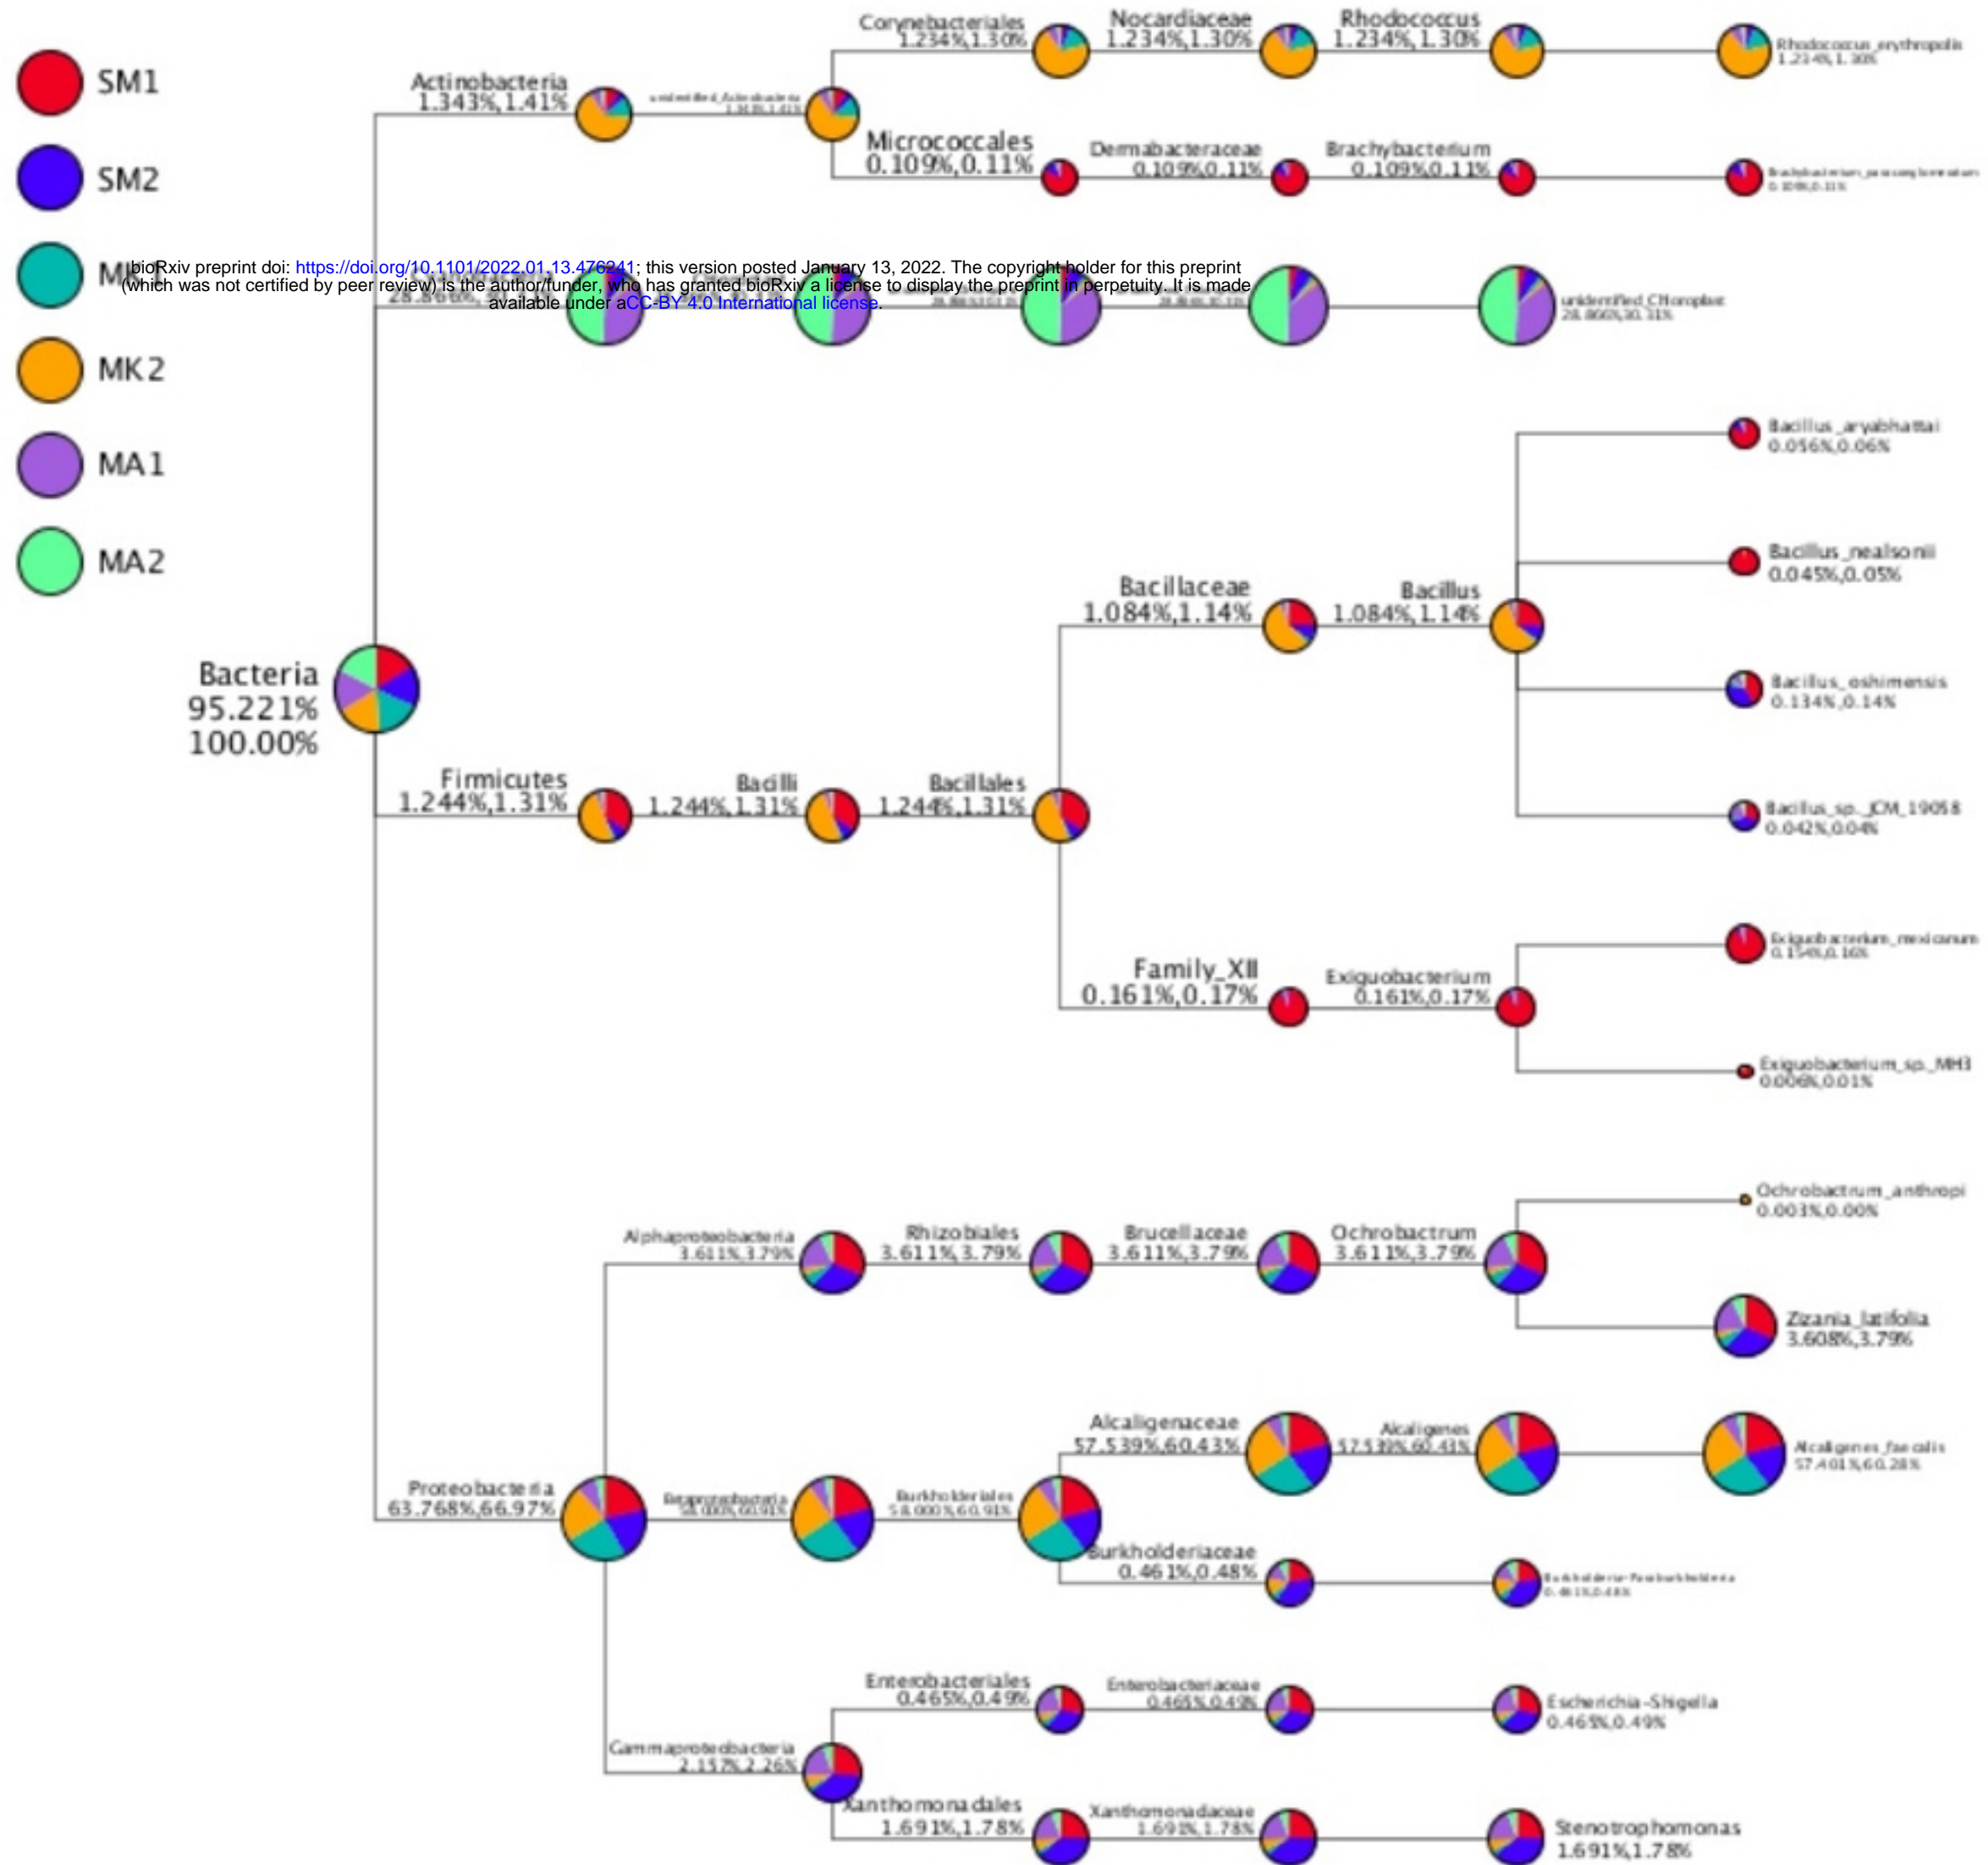

Fig. 2

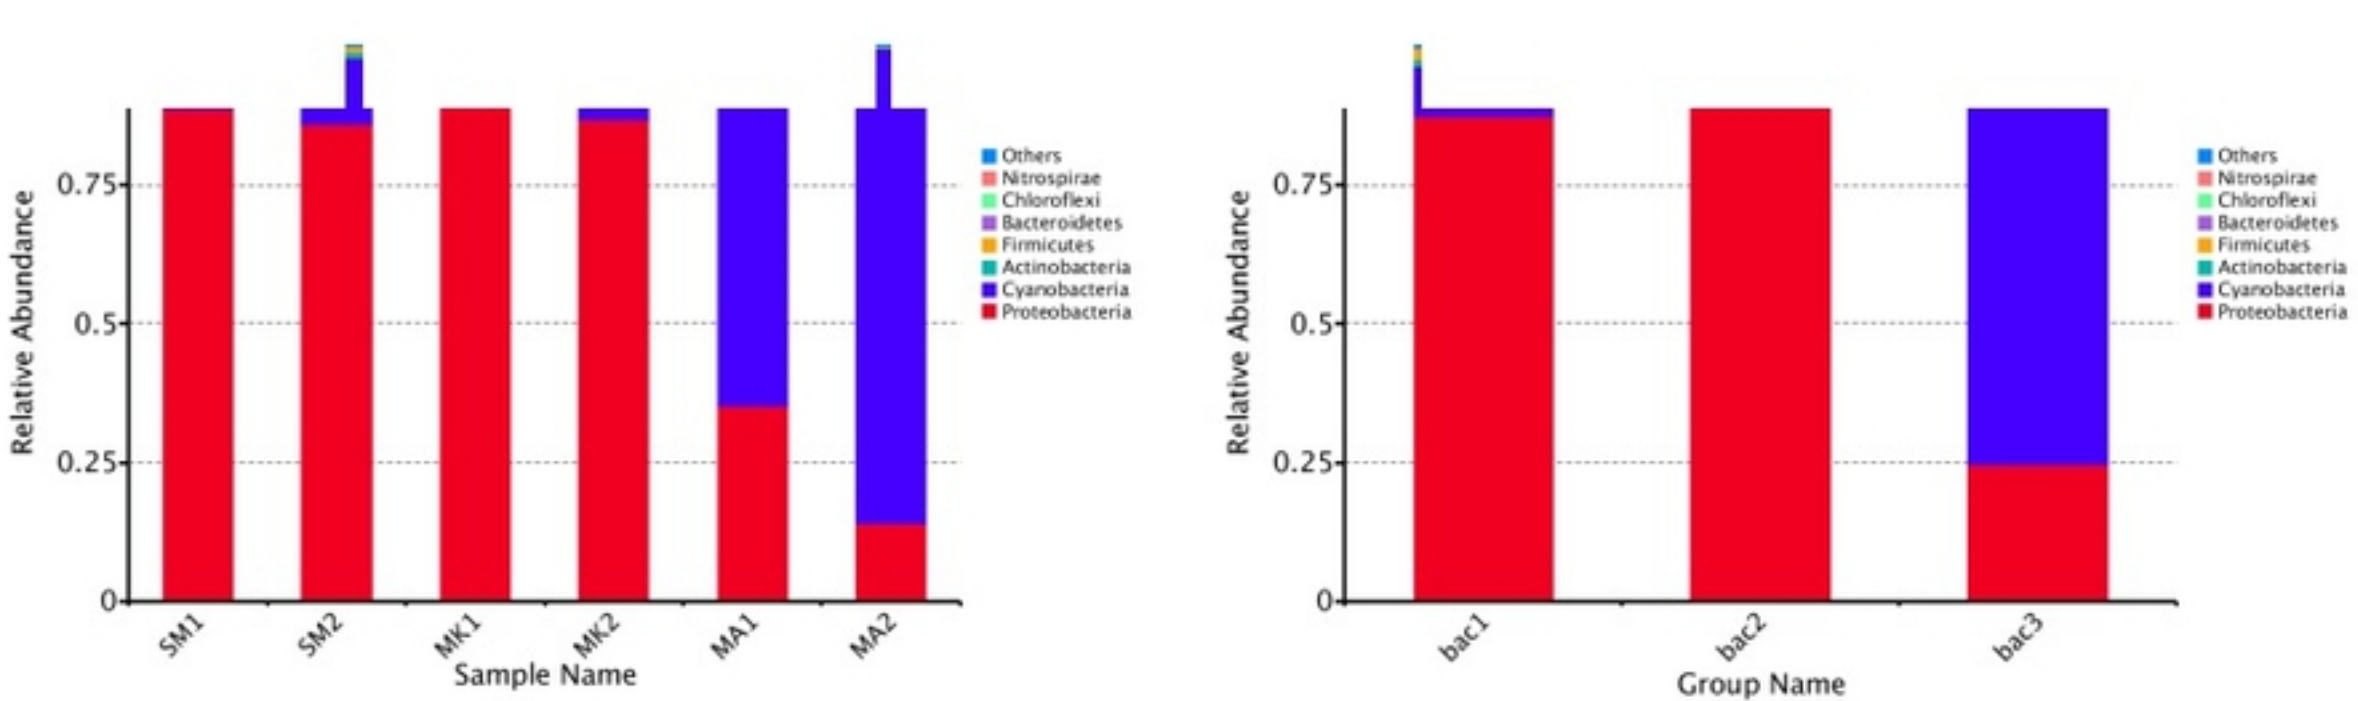

Fig. 3

bioRxiv preprint doi: <https://doi.org/10.1101/2022.01.13.476241>; this version posted January 13, 2022. The copyright holder for this preprint (which was not certified by peer review) is the author/funder, who has granted bioRxiv a license to display the preprint in perpetuity. It is made available under aCC-BY 4.0 International license.

Abundance  
■ bac1  
■ bac2  
■ bac3

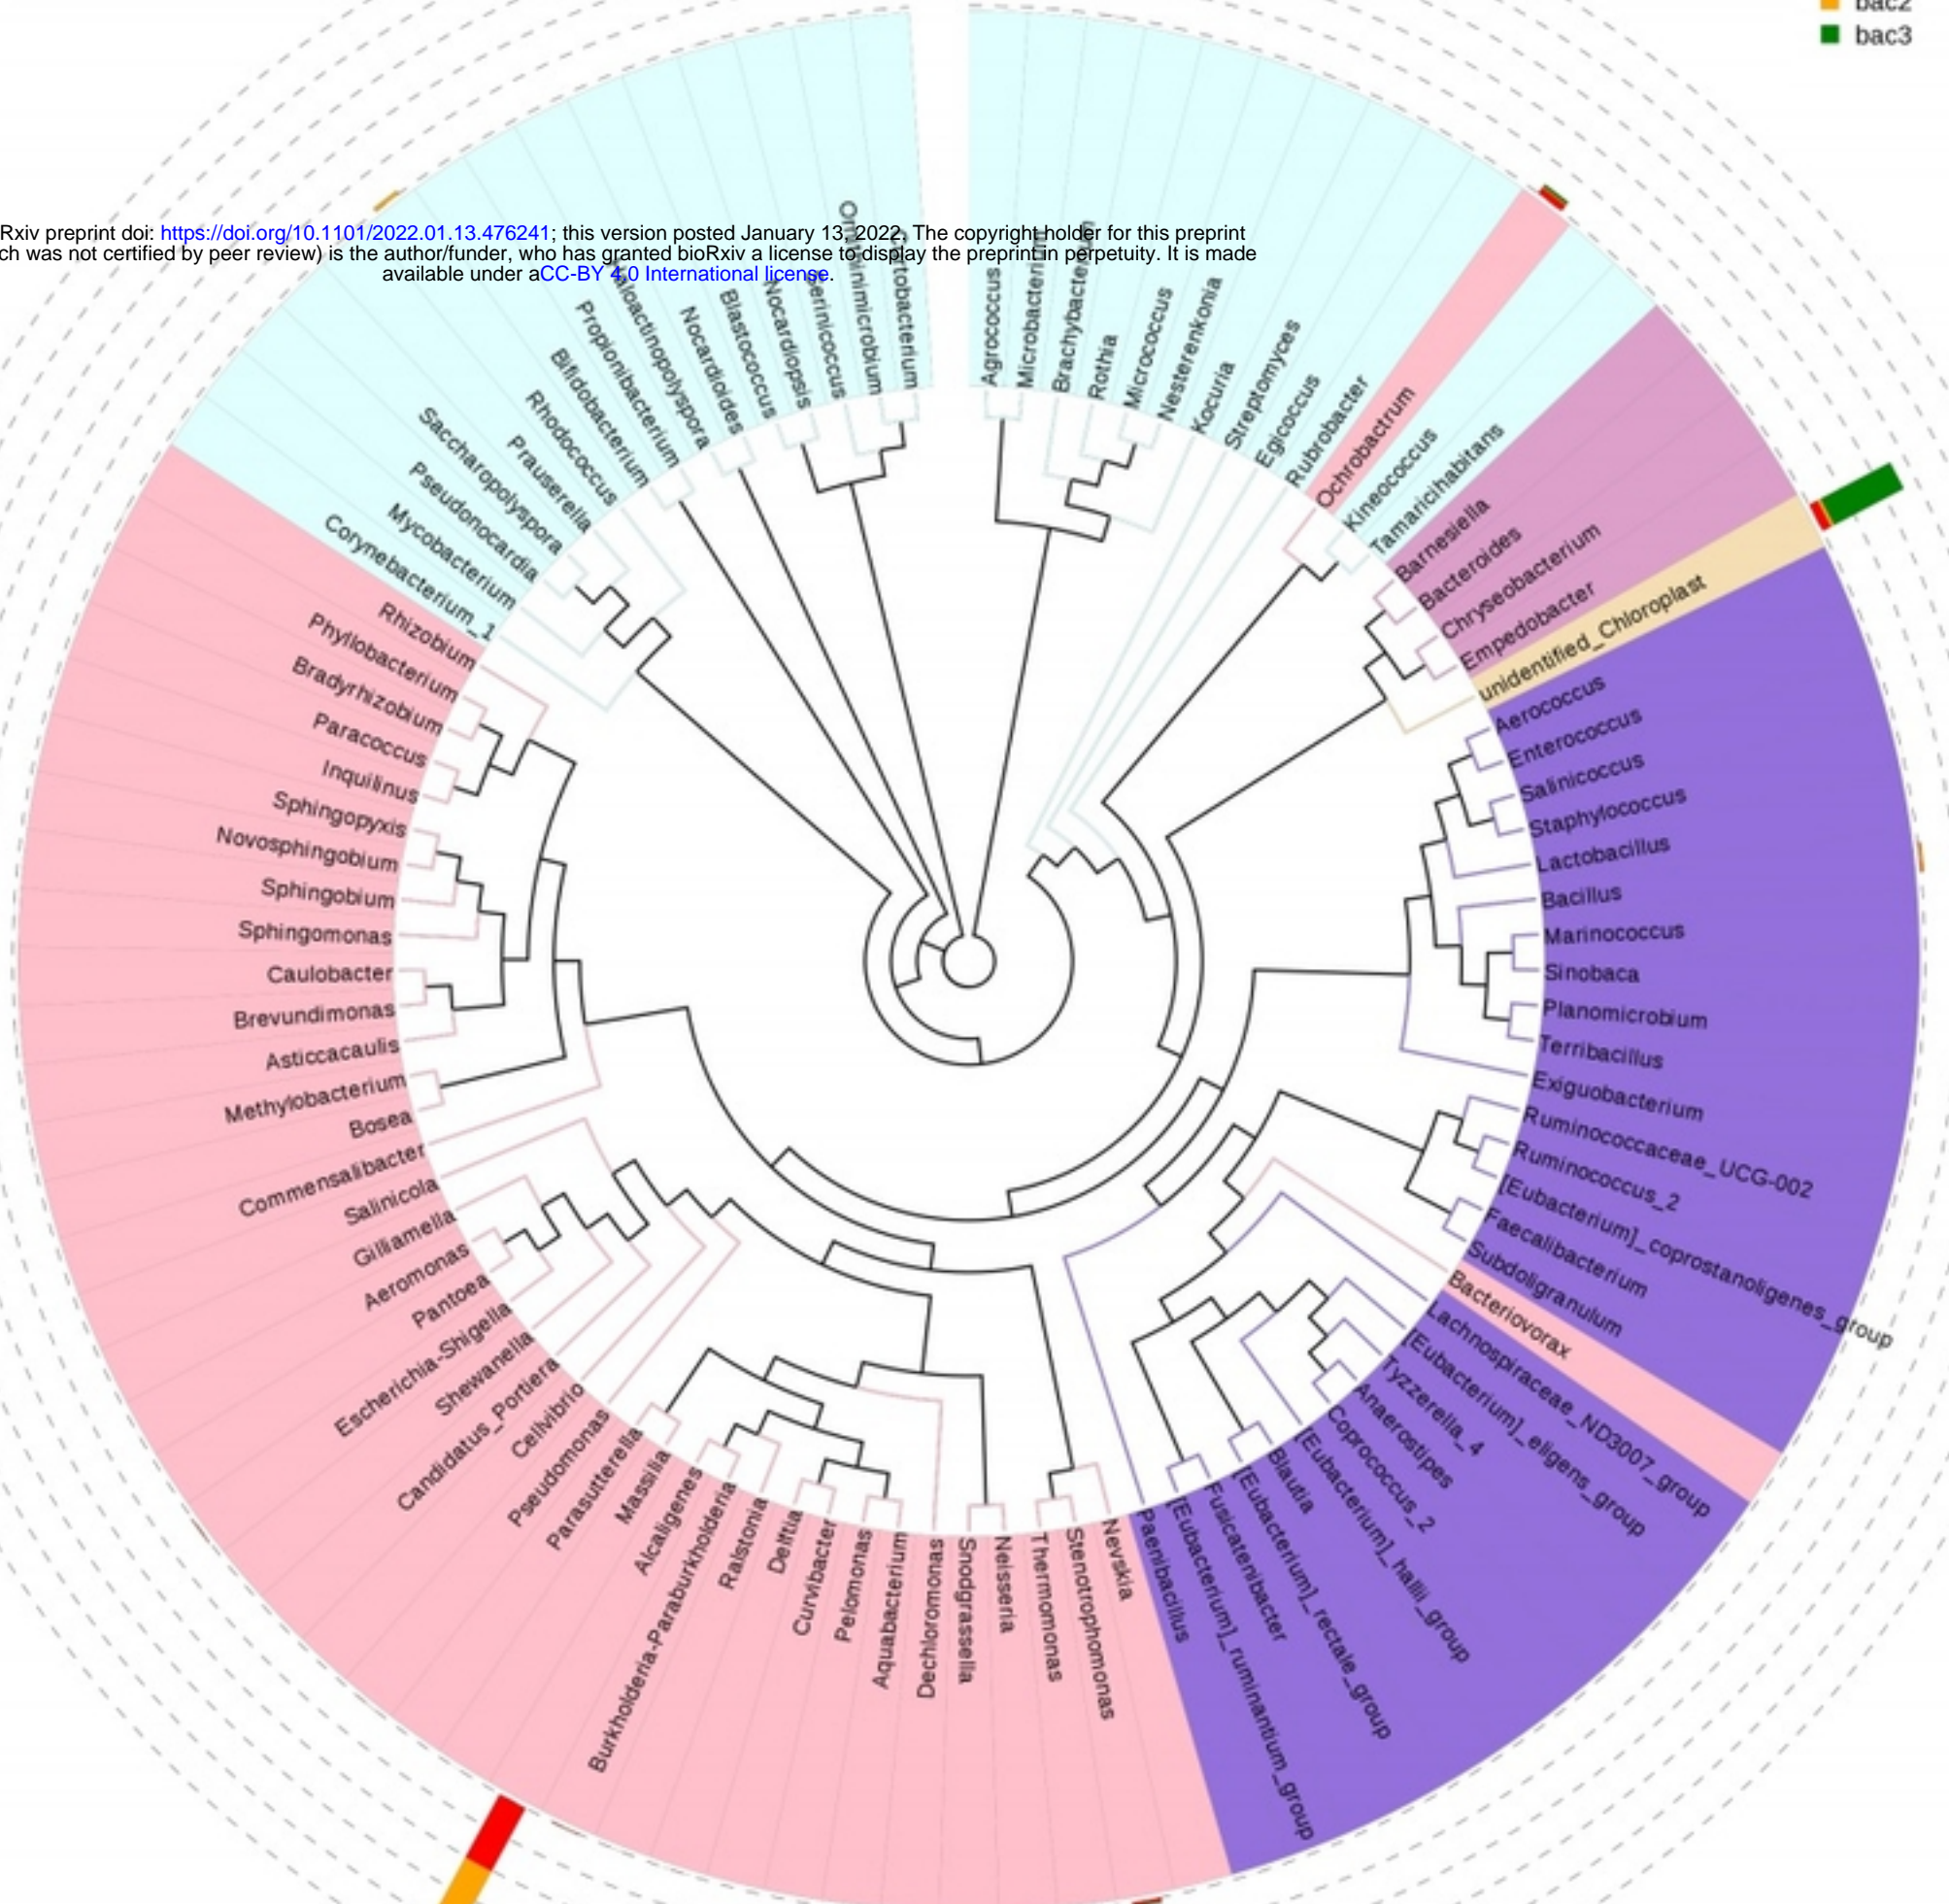

Fig. 4

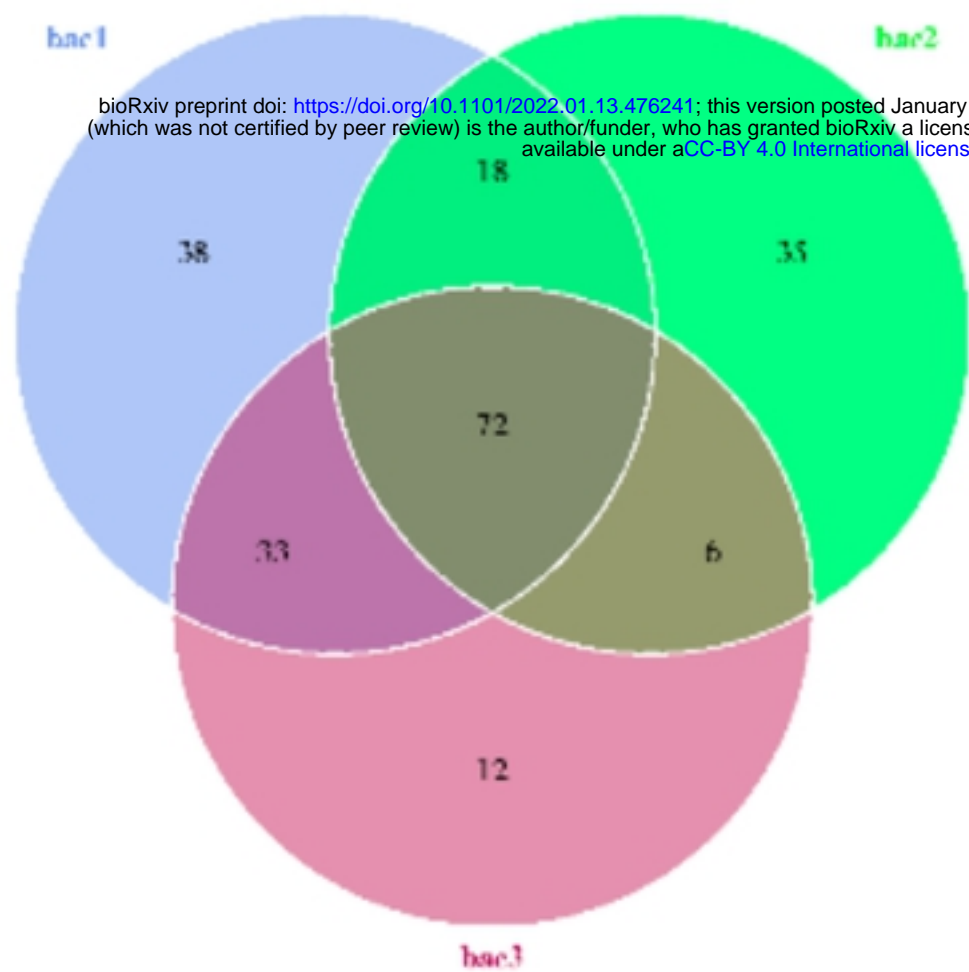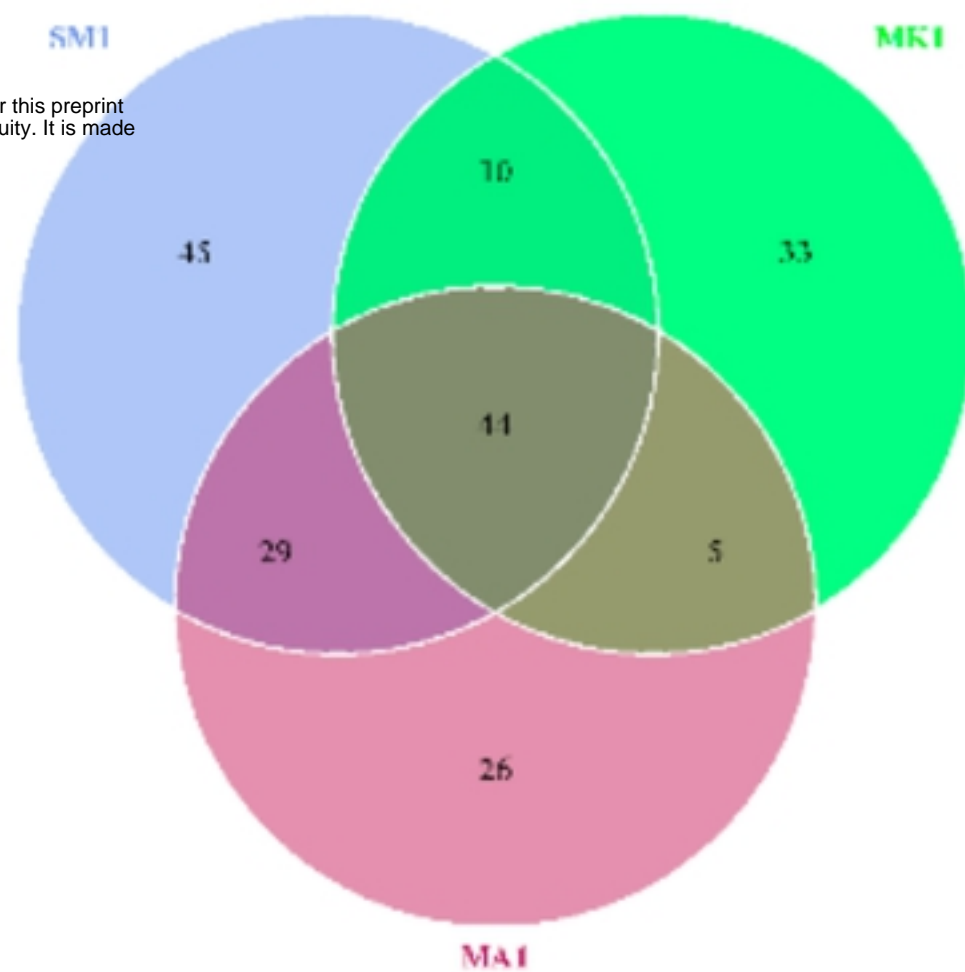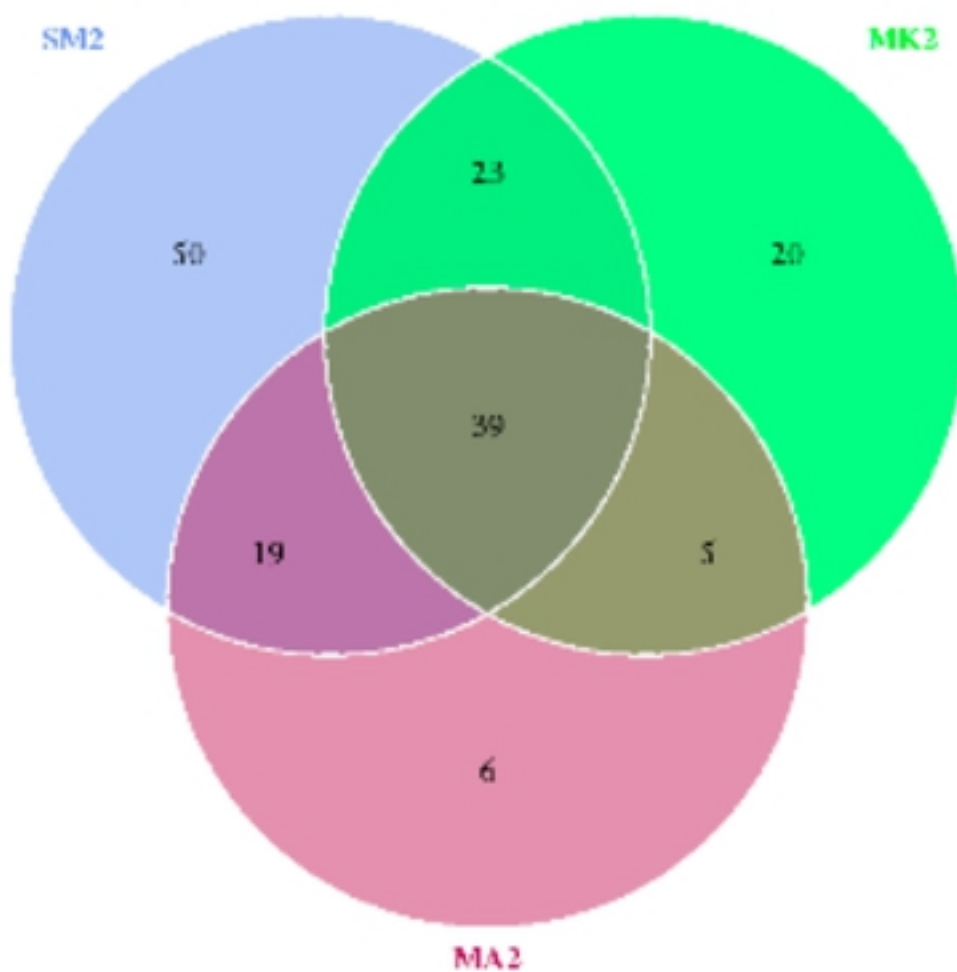

Fig. 5

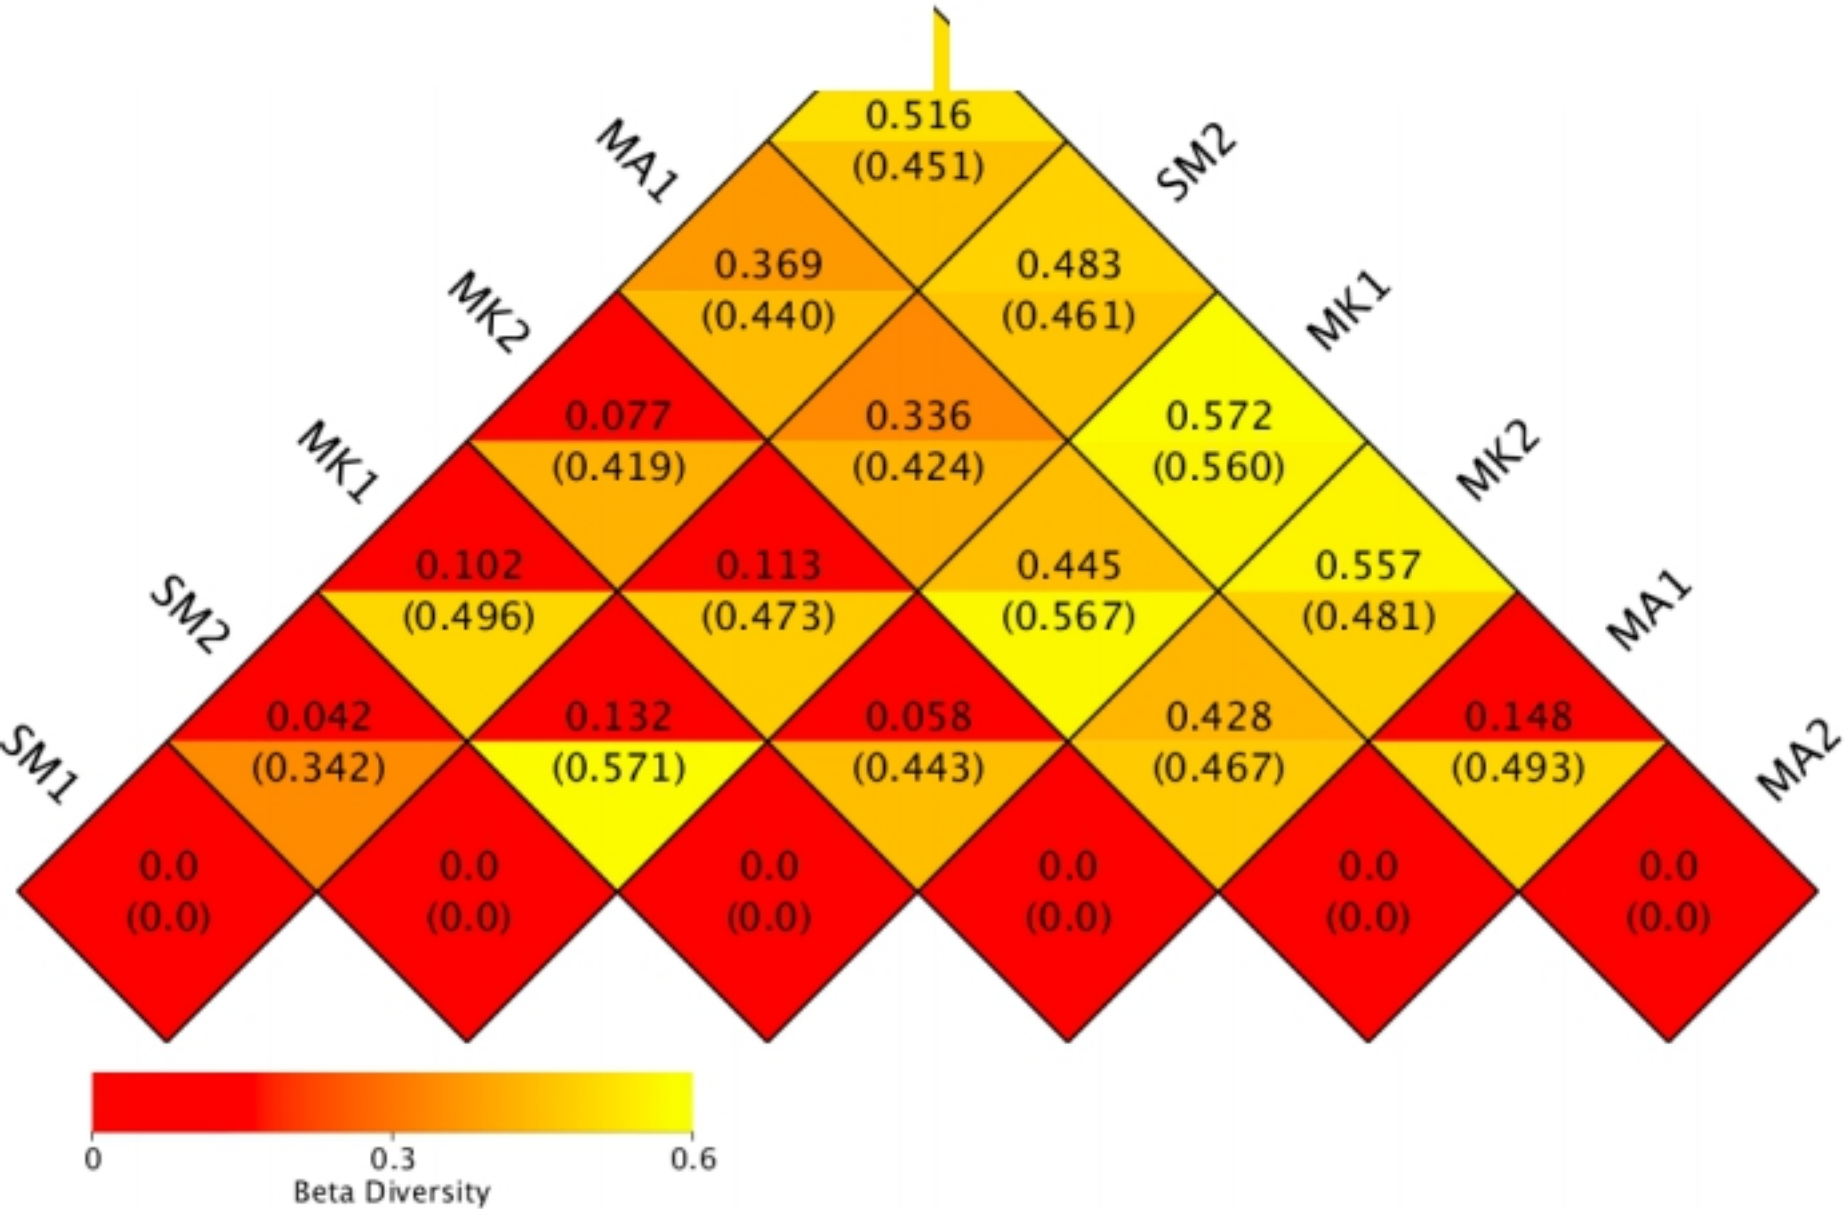

Fig. 6

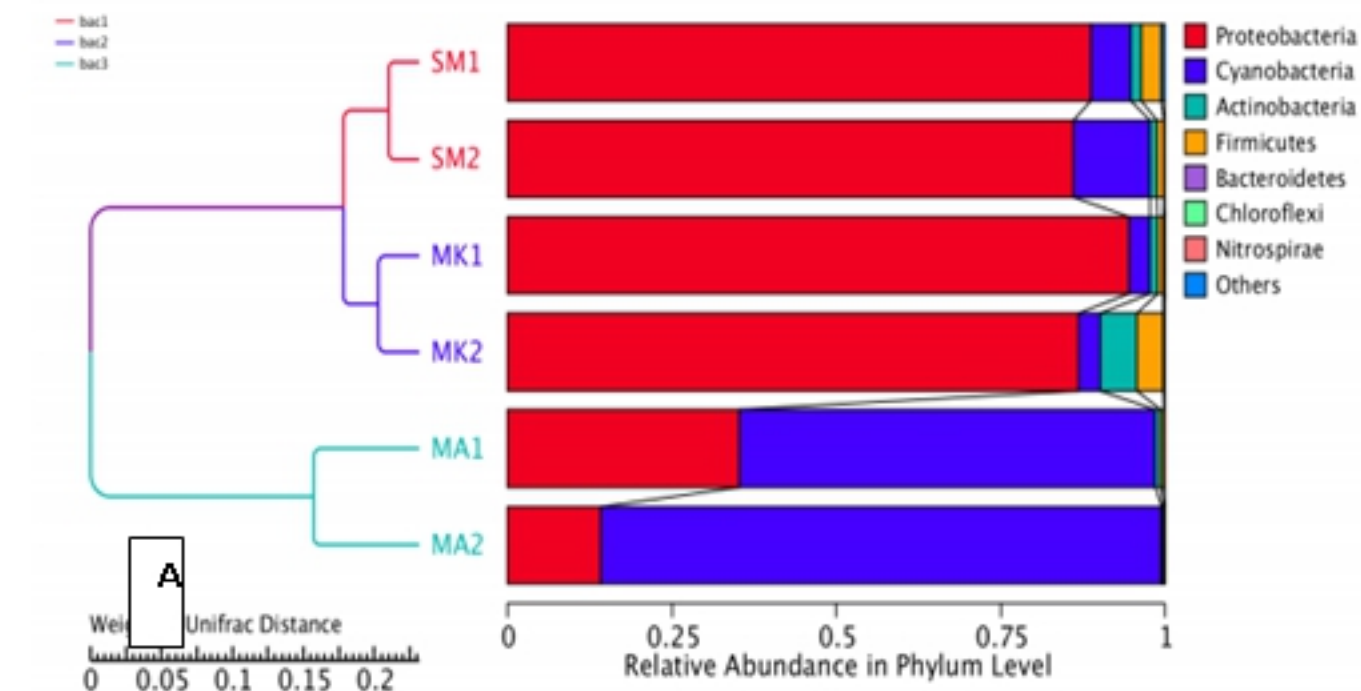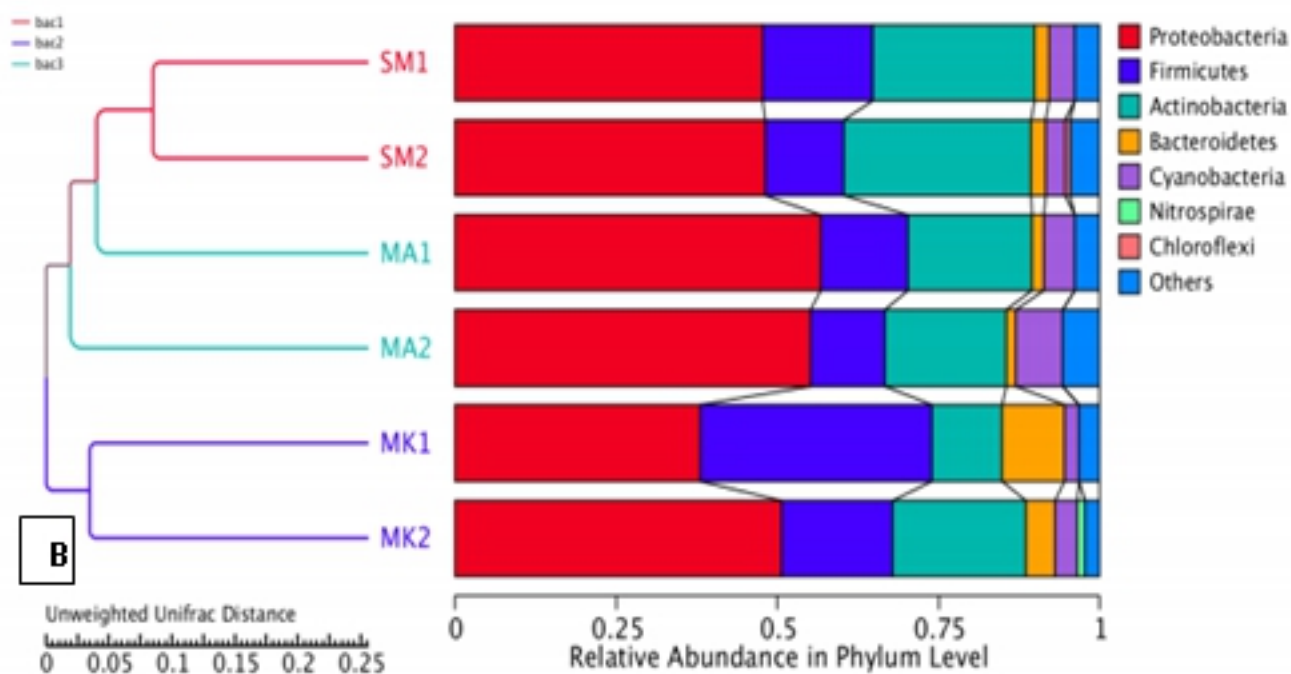

Fig. 7
